# Supplementary material
Source: PubMed Central journal article supplement (PMC3784167)
Supplement: imm0140-0211-SD3.pdf [file imm0140-0211-SD3.pdf]

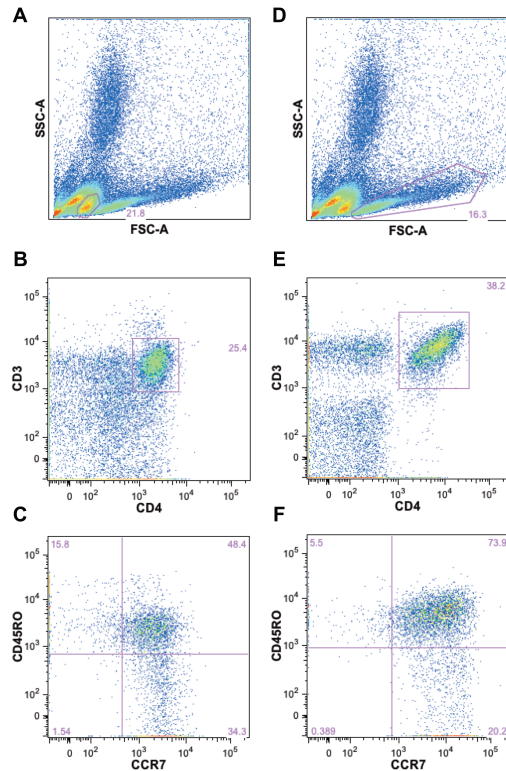

**Supplementary figure 3. Gating strategy and example of FACS plots from a typical NZB treated patient.**

(A) Lymphocyte gate of resting lymphocytes. (B) CD3 and CD4 expression on cells from the lymphocyte gate in A. The gate is set on CD4+ T cells. (C) CD45RO and CCR7 expression on CD4+ T cells. (D) Lymphocyte gate of activated lymphocytes. (E) CD3 and CD4 expression on cells from the lymphocyte gate in D. The gate is set on CD4+ T cells. (F) CD45RO and CCR7 expression on CD4+ T cells. These T cells express more CD45RO and CCR7 than the resting T cells in C.
